# Supplementary material
Source: PubMed Central journal article supplement (PMC1693723)

PKC-theta

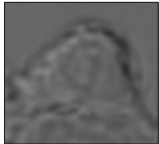

LFA-1

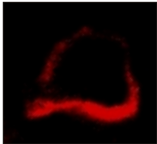

Merge

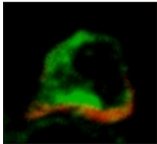

Reslice

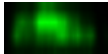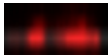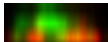

Supplement: pnas_0602458103_1.pdf [file pnas_0602458103_1.pdf]

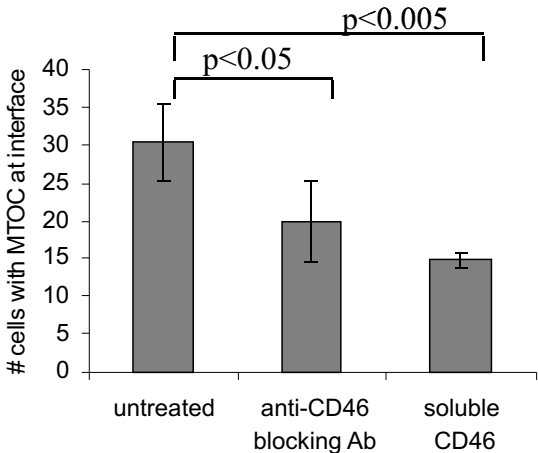

Supplement: pnas_0602458103_2.pdf [file pnas_0602458103_2.pdf]

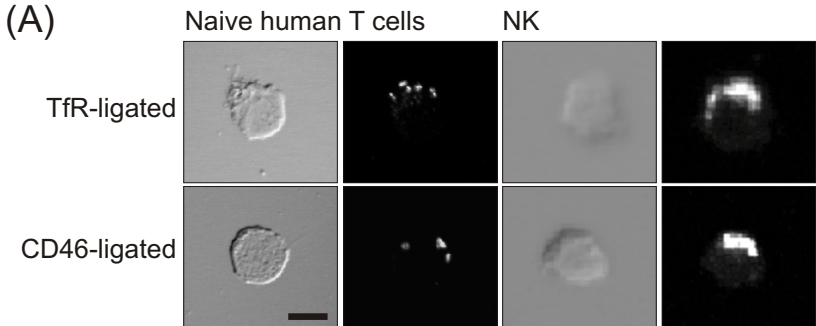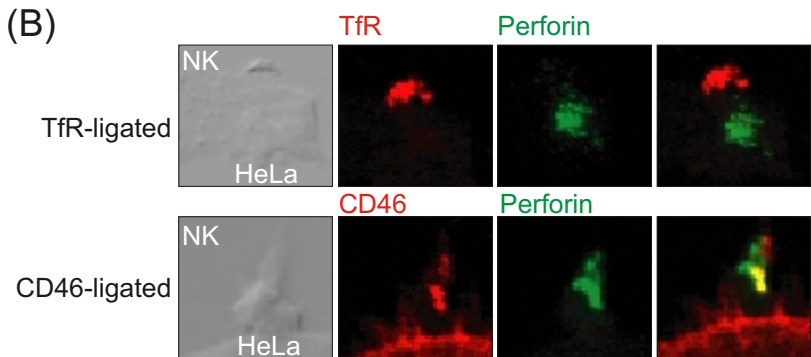

Supplement: pnas_0602458103_3.pdf [file pnas_0602458103_3.pdf]
